# Supplementary material for: USP22 promotes development of lung adenocarcinoma through ubiquitination and immunosuppression
Source: publisher site journal article supplement (doi:10.18632/aging.103056), 2020-04-15
Supplement: Supplementary file [file aging-v12i8-103056-supplementary-material-SD1.pdf]

## SUPPLEMENTARY FIGURE

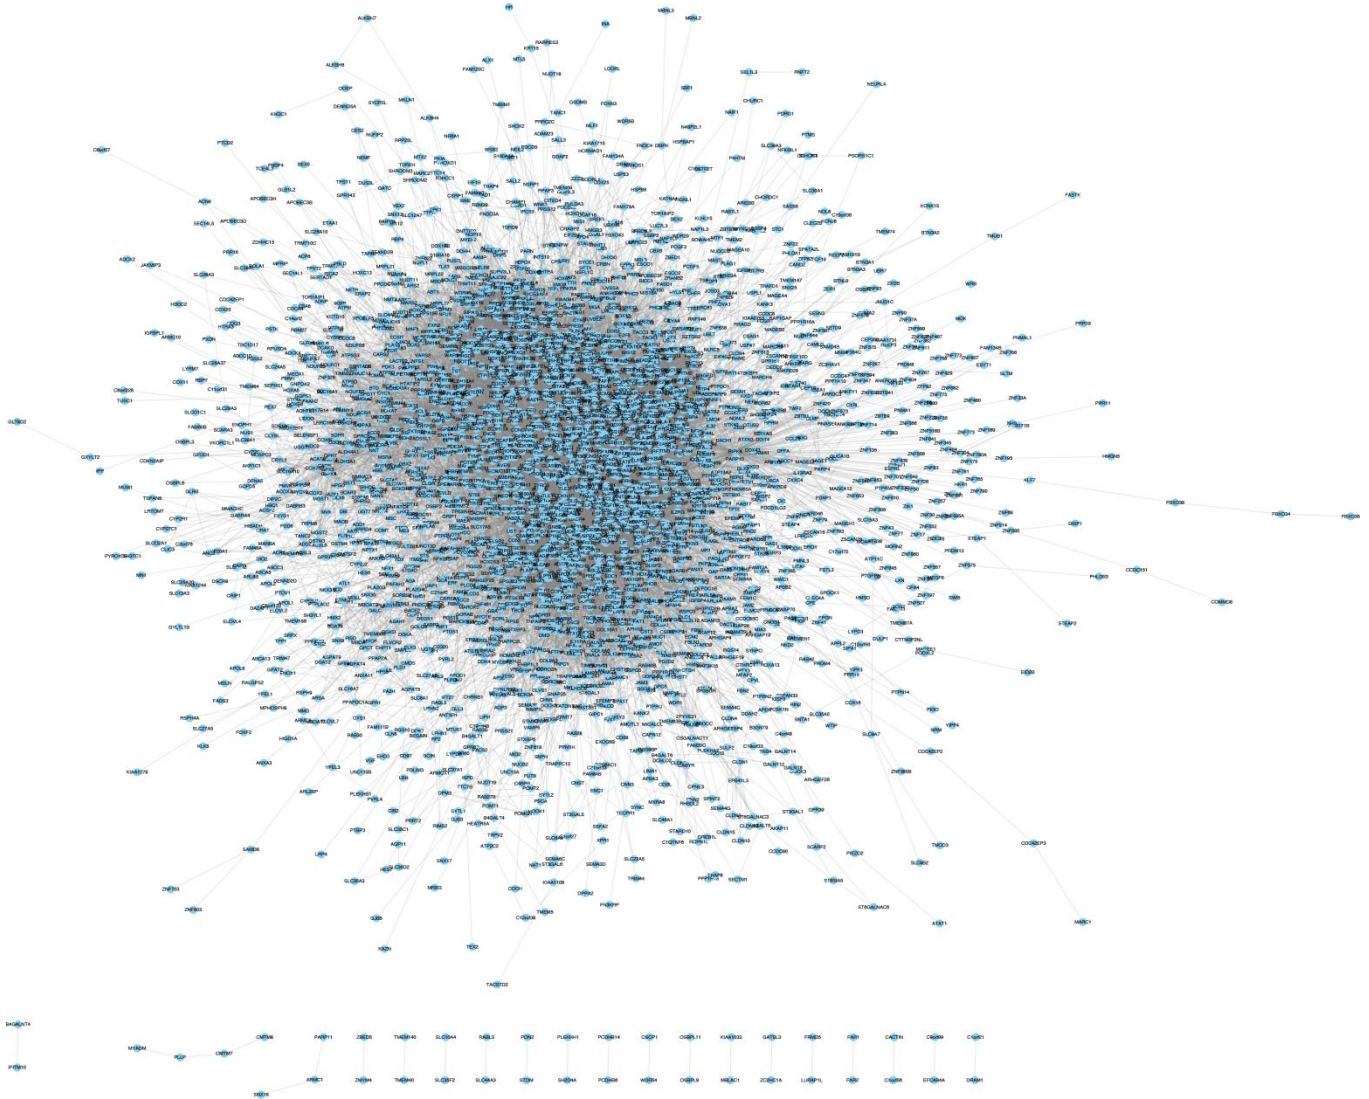

Supplementary Figure 1. Protein-protein interaction network of differentially expressed genes between USP22-KD and negative control H1975 cells.
